# Supplementary material
Source: PubMed Central journal article supplement (PMC7175920)
Supplement: NIHMS1519622-supplement-supplemental_tables.pdf [file NIHMS1519622-supplement-supplemental_tables.pdf]

**Supplementary Table 1**

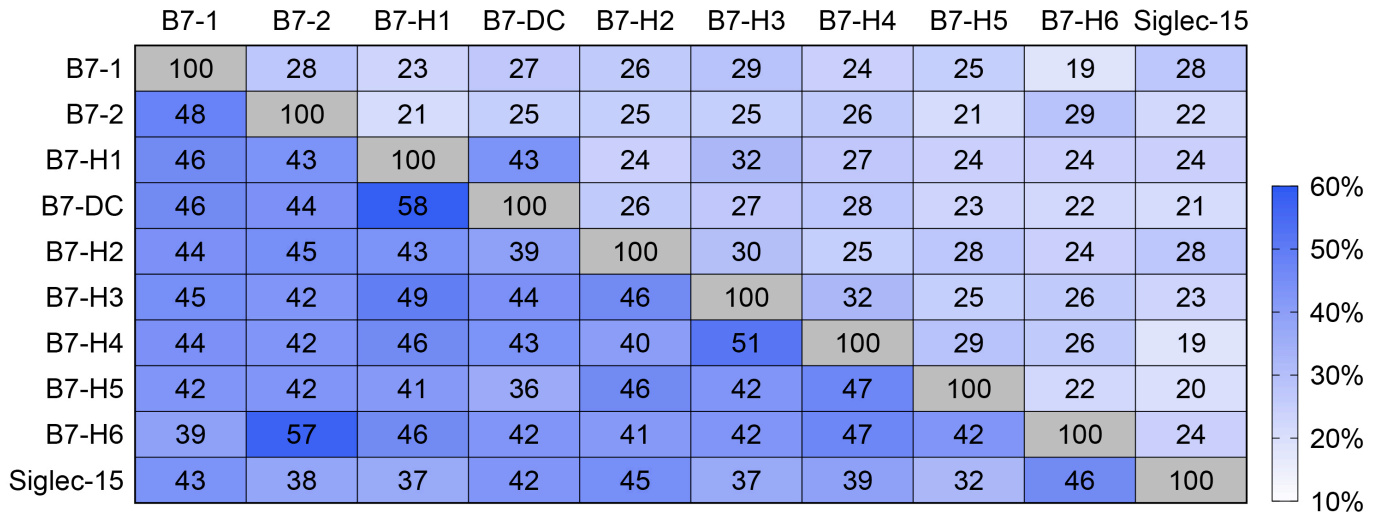

**Supplementary Table 2**

| <b>Yale NSCLC cohort</b> |                       |                |                |
|--------------------------|-----------------------|----------------|----------------|
|                          |                       | Number (n=241) | Percentage (%) |
| <b>Age</b>               | <70                   | 122            | 50.6           |
|                          | ≥70                   | 96             | 39.8           |
|                          | Unknown               | 23             | 9.5            |
| <b>Sex</b>               | Female                | 123            | 51.0           |
|                          | Male                  | 97             | 40.2           |
|                          | Unknown               | 21             | 8.7            |
| <b>Smoking history</b>   | Never smoker          | 32             | 13.3           |
|                          | Former/Current smoker | 174            | 72.2           |
|                          | Unknown               | 35             | 14.5           |
| <b>Stage</b>             | I/II                  | 175            | 72.6           |
|                          | III/IV                | 37             | 15.4           |
|                          | Unknown               | 29             | 12.0           |
| <b>Histology</b>         | ADC                   | 121            | 50.2           |
|                          | SCC                   | 59             | 24.5           |
|                          | Other                 | 38             | 15.8           |
|                          | Unknown               | 23             | 9.5            |

**Supplementary Table 1. Homology of human Siglec-15 to the B7 family proteins.** An alignment of human Siglec-15 to human B7 family proteins was conducted using the Protein Blast program (NCBI). Data are displayed as the identity (x -axis) and the identity plus similarity (y -axis) of the extracellular domains of these molecules.

**Supplementary Table 2: Clinicopathological characteristics of the patients from the Yale NSCLC cohort.**
